# Supplementary material for: Visible-light photoredox-catalyzed aryl radical in situ SO2-capture reactions
Source: Royal Society of Chemistry journal article supplement (doi:10.1039/d1qo00099c), 2021-01-01
Supplement: d1qo00099c1.pdf [file d1qo00099c1.pdf]

# Supporting information

## **Visible-Light Photoredox-Catalyzed Aryl Radical *in situ* SO<sub>2</sub>-capture Reactions**

Min Zheng, Ke Gao, Yanhu Zhang and Hongjian Lu<sup>\*[a]</sup>

---

[a] M. Zheng, Ke Gao, Yanhu Zhang and Prof. Dr. H. Lu  
Institute of Chemistry & BioMedical Sciences, Jiangsu Key Laboratory of Advanced Organic Materials, School of Chemistry  
and Chemical Engineering, Nanjing University, Nanjing, 210023, China. E-mail: hongjianlu@nju.edu.cn

# Table of Content

|                                                                                 |    |
|---------------------------------------------------------------------------------|----|
| 1. General Information .....                                                    | 3  |
| 2. Detailed Optimization of Reaction Conditions .....                           | 4  |
| 2.1 Table S1: Screen of the reaction condition for synthesis of <b>3a</b> ..... | 4  |
| 2.2 Table S2: Screen of the reaction condition for synthesis of <b>7a</b> ..... | 5  |
| 3. General Procedures for <i>in situ</i> SO <sub>2</sub> Capture Reaction ..... | 6  |
| 3.1 General procedures for synthesis $\beta$ -ketone sulfones <b>3</b> .....    | 6  |
| 3.2 General procedures for synthesis allyl sulfones <b>5</b> .....              | 6  |
| 3.3 General procedures for synthesis alkynyl sulfones <b>7</b> .....            | 6  |
| 3.4 Synthesis of <b>2e</b> .....                                                | 6  |
| 3.5 General procedures for control experiments .....                            | 8  |
| 4. Proposed Mechanism for Synthesis of alkynyl arylsulfones .....               | 10 |
| 5. Spectroscopic Data .....                                                     | 11 |
| 6. Reference .....                                                              | 21 |
| 7. Copies of NMR spectra .....                                                  | 22 |

## 1. General Information

Unless otherwise mentioned, all commercial reagents and solvents were used without further purification. Thin layer chromatography (TLC) was performed on pre-coated silica gel GF254 plates. Visualization of TLC was achieved by the use of UV light (254 nm). Column chromatography was performed on silica gel (300-400 mesh) using a proper eluent.  $^1\text{H}$  NMR was recorded on FT AM 400 (400 MHz). Chemical shifts were reported in parts per million (ppm) referenced to the appropriate solvent peak or 0.0 ppm for tetramethylsilane or chloroform-d ( $\text{CDCl}_3$ ) at 7.26 ppm. The following abbreviations were used to describe peak splitting patterns: brs = broad, s = singlet, d = doublet, t = triplet, q = quartet, dd = doublet of doublet, td = triplet of doublet, ddd = doublet of doublet of doublet, m = multiplet. Coupling constants,  $J$ , were reported in hertz (Hz). The fully decoupled  $^{13}\text{C}$  NMR was recorded on FT AM 400 (101 MHz). Chemical shifts were reported in ppm referenced to the center of a triplet at 77.36 ppm of chloroform-d. Infrared (IR) spectra were recorded neat in KBr cell. Frequencies are given in centimeter inverse ( $\text{cm}^{-1}$ ) and only selected absorbance is reported. High resolution mass spectra were obtained by using the UHD Accurate-Mass Q-TOF. Vinyl triflates<sup>[1]</sup>, arenediazonium salts<sup>[2]</sup>, propylene triflates<sup>[3]</sup>, acetylenic triflates<sup>[4]</sup> were prepared from the corresponding materials according to previously reported methods.

## 2. Detailed Optimization of Reaction Conditions

### 2.1 Table S1: Screen of the reaction condition for synthesis of 3a



| Entry                 | 1a:2a        | photocatalyst                                   | solvent            | c/mol.L <sup>-1</sup> | yield      |
|-----------------------|--------------|-------------------------------------------------|--------------------|-----------------------|------------|
| 1                     | 1:1          | Ir(ppy) <sub>2</sub> (dtbbpy)PF <sub>6</sub>    | DMF                | 0.05                  | 10%        |
| 2                     | 1:1          | Ru(bpy) <sub>3</sub>                            | DMF                | 0.05                  | 15%        |
| 3                     | 1:1          | Ru(bpy) <sub>3</sub> Cl <sub>2</sub>            | DMF                | 0.05                  | 26%        |
| 4                     | 1:1          | Acridine•HCl                                    | DMF                | 0.05                  | 0%         |
| 5                     | 1:1          | Ir(dFMeppy) <sub>2</sub> (bpy)•PF <sub>6</sub>  | DMF                | 0.05                  | 15%        |
| 6                     | 1:1          | Ir(ppy) <sub>3</sub>                            | DMF                | 0.05                  | 0%         |
| 7                     | 1:1.5        | Ru(bpy) <sub>3</sub> Cl <sub>2</sub>            | 1,4-dioxane        | 0.05                  | 38%        |
| 8                     | 1:1.5        | Ru(bpy) <sub>3</sub> Cl <sub>2</sub>            | 1,4-dioxane        | 0.10                  | 63%        |
| 9                     | 1:1.5        | Ru(bpy) <sub>3</sub> Cl <sub>2</sub>            | 1,4-dioxane        | 0.20                  | 59%        |
| <b>10<sup>b</sup></b> | <b>1:2.0</b> | <b>Ru(bpy)<sub>3</sub>Cl<sub>2</sub></b>        | <b>1,4-dioxane</b> | <b>0.10</b>           | <b>75%</b> |
| 11                    | 1:2.0        | Ru(bpy) <sub>3</sub> Cl <sub>2</sub> (0.5 mol%) | 1,4-dioxane        | 0.20                  | 61%        |
| 12                    | 1:2.0        | --                                              | 1,4-dioxane        | 0.20                  | 18%        |
| 13 <sup>c</sup>       | 1:2.0        | Ru(bpy) <sub>3</sub> Cl <sub>2</sub>            | 1,4-dioxane        | 0.20                  | trace      |

[a] A 10 mL Schlenk tube filled with argon, **1a**(0.2 mmol), **2a**(0.4 mmol), photocatalyst(1 mol%) and solvent were added under argon atmosphere. Irradiated by white LEDs(24 W) and stirred for 1 hour. Isolated yield.[b] With **1a**(0.4 mmol), **2a**(0.8 mmol). [c] The reaction was stirred in dark.

As shown in Table S1, among the conditions tested, when under the **condition A** (entry 10), the reaction gave the best result, and we confirmed the condition for the further substrates 3a scope exploration.

## 2.2 Table S2: Screen of the reaction condition for synthesis of 7a



| Entry                 | 1a:6a        | photocatalyst                            | solvent        | Additive1                  | Additive2   | yield      |
|-----------------------|--------------|------------------------------------------|----------------|----------------------------|-------------|------------|
| 1                     | 1:1.5        | Ru(bpy) <sub>3</sub> Cl <sub>2</sub>     | dioxane        | --                         | --          | 21%        |
| 2                     | 1:1.5        | Ru(bpy) <sub>3</sub> Cl <sub>2</sub>     | DMF            | --                         | --          | 11%        |
| 3                     | 1:1          | Ru(bpy) <sub>3</sub> Cl <sub>2</sub>     | dioxane        | Mesitylene(0.5 eq.)        | --          | 31%        |
| 4                     | 1:1          | Ru(bpy) <sub>3</sub> Cl <sub>2</sub>     | dioxane        | Mesitylene(1.0 eq.)        | --          | 30%        |
| 5                     | 1:1          | Ru(bpy) <sub>3</sub> Cl <sub>2</sub>     | dioxane        | Mesitylene(2.0 eq.)        | --          | 32%        |
| 6                     | 1:1          | Ru(bpy) <sub>3</sub> Cl <sub>2</sub>     | dioxane        | Mesitylene(4.0 eq.)        | --          | 36%        |
| 7                     | 1.5          | Ru(bpy) <sub>3</sub> Cl <sub>2</sub>     | dioxane        | Mesitylene(8.0 eq.)        | --          | 35%        |
| 8                     | 1.5          | Ru(bpy) <sub>3</sub> Cl <sub>2</sub>     | DMF            | Mesitylene(4.0 eq.)        | --          | 30%        |
| 9                     | 1.5          | Ru(bpy) <sub>3</sub> Cl <sub>2</sub>     | MeCN           | Mesitylene(4.0 eq.)        | --          | trace      |
| 10                    | 1.5          | Ru(bpy) <sub>3</sub> Cl <sub>2</sub>     | DMSO           | Mesitylene(4.0 eq.)        | --          | --         |
| 11                    | 1.5          | Ru(bpy) <sub>3</sub> Cl <sub>2</sub>     | dioxane        | Ar1(4.0 eq.)               | --          | mess       |
| 12                    | 1.5          | Ru(bpy) <sub>3</sub> Cl <sub>2</sub>     | dioxane        | Ar2(4.0 eq.)               | --          | mess       |
| 13                    | 1:1.5        | Ru(bpy) <sub>3</sub> Cl <sub>2</sub>     | dioxane        | Mesitylene(4.0 eq.)        | MS4Å        | 39%        |
| 14                    | 1:2.0        | Ru(bpy) <sub>3</sub> Cl <sub>2</sub>     | dioxane        | Mesitylene(4.0 eq.)        | MS4Å        | 43%        |
| <b>15<sup>c</sup></b> | <b>1:2.0</b> | <b>Ru(bpy)<sub>3</sub>Cl<sub>2</sub></b> | <b>dioxane</b> | <b>Mesitylene(4.0 eq.)</b> | <b>MS4Å</b> | <b>47%</b> |



[a] A 10 mL Schlenk tube filled with argon, **1a**, **6a**, photocatalyst(1 mol%), additive, solvent were added under argon atmosphere. Irradiated by white LEDs(24 W) and stirred for 2 hours. Isolated yield. [b] With activated MS4Å (100 mg) [c] With 0.5 mol% Ru(bpy)<sub>3</sub>Cl<sub>2</sub>, and stirred for 12 h.

As shown in Table S2, among the conditions tested, when under the **condition** (entry 15), the reaction gave the best result, and we confirmed the condition for the further substrates scope exploration.

### 3. General Procedures for *in situ* SO<sub>2</sub> Capture Reaction

#### 3.1 General procedures for synthesis $\beta$ -ketone sulfones 3



**Condition A:** Under Argon atmosphere, **1** (0.4 mmol), **2** (0.8 mmol), Ru(bpy)<sub>3</sub>Cl<sub>2</sub> (1 mol%) were dissolved in 1,4-dioxane (4 mL). After that, the solution was stirred under irradiation of white LEDs for 1 hour. The crude products were purified by flash chromatography on silica gel (petroleum ether/ethyl acetate 5:1~2:1) to afford the aim products.

#### 3.2 General procedures for synthesis allyl sulfones 5



**Condition B:** Under Argon atmosphere, **1** (0.4 mmol), **4** (0.8 mmol), Ru(bpy)<sub>3</sub>Cl<sub>2</sub> (1 mol%) were dissolved in 1,4-dioxane (4 mL). After that, the solution was stirred under irradiation of white LEDs for 2 hours. The crude products were purified by flash chromatography on silica gel (petroleum ether/ethyl acetate 5:1~2:1) to afford the aim products **5**.

#### 3.3 General procedures for synthesis alkynyl sulfones 7



**Condition C:** Under Argon atmosphere, **1** (0.2 mmol), **6** (0.4 mmol), Mesitylene (0.8 mmol), activated MS4A (100 mg), (Ru(bpy)<sub>3</sub>Cl<sub>2</sub>) (0.5 mol%) were dissolved in 1,4-dioxane (1 mL). After that, the solution was stirred under irradiation of white LEDs (24 W) for 12 hours. The crude products were purified by flash chromatography on silica gel (petroleum ether/DCM 2:1~1:1) to afford the aim products **7**.

#### 3.4 Synthesis of 2e



To a solution of 1-(*p*-tolyl)ethan-1-one (10 mmol, 1.34 g) and Na<sub>2</sub>CO<sub>3</sub> (20 mmol, 2.12g) in DCM (15 ml) was cooled to 0 °C, Tf<sub>2</sub>O(15 mmol, 4.23g, dissolved in 10 mL DCM) was added dropwise to the solution. The mixture was warmed to room temperature and stirred for another 12 h. NaHCO<sub>3</sub>(sat. 50 mL) NaHCO<sub>3</sub> (sat. 50 mL) was poured to the solution, and petroleum(100 mL) was added. The organic layer was separate and washed with more NaHCO<sub>3</sub> (sat. aq. 50 mL), brine (sat. 50 mL), and dried over Na<sub>2</sub>SO<sub>4</sub>, the solvent was removed under reduced pressure and afford the crude product 2j (mix with 1-(*p*-tolyl)ethan-1-one, 4:8, about 50 wt.%). The mixture was used in the synthesis of beta-ketone sulfone reaction without further purification.

Crude <sup>1</sup>H NMR for the mixture.



### 3.5 General procedures for control experiments



Under the standard condition, TEMPO(2.0 eq.) was added to the reaction, TLC and <sup>1</sup>H NMR spectrum showed that the generation of **3aa** was inhibited completely, and the phenyl-TEMPO adduct could be detected by HRMS analysis, this result suggested that the phenyl radical was generated in the reaction.



Under the standard condition, silyl enol ether **2a'**(2.0 eq.) was added to the reaction. Besides the product **3a** was detected in 48% yield and the product **3d** could also be detected in 16% yield by <sup>1</sup>H NMR (use CH<sub>2</sub>Br<sub>2</sub> as internal standard), this result suggested that the product is generate via intermolecular addition other than an intramolecular sulfonyl shift process.



Under the standard condition, besides the product **3j** was obtained in 76% yield and the byproduct **3j'** could also be isolated in 37% yield, this result suggested that part of enol triflates could serve as SO<sub>2</sub> source in the reaction.



Under the standard condition, **2j** could transform into **3j'** directly under standard condition, which reveal how the iniatial SO<sub>2</sub> come into being.





Under the standard condition, applied aryl diazo compound **8** (0.2 mmol) and enol triflate **2a** (0.4 mmol) as substrates, the product **9** could be isolated in 45% yield. This result indicated that initiation from the aryl diazo compound.



Under initial condition of *de*- $\text{CF}_3$  arylation reaction, the side product **10** could be isolated in 32% yield, this result suggested that solvent have a great influence in target product yield.



Under standard condition of *de*- $\text{CF}_3$  arylation reaction, the side product **Mes-CF<sub>3</sub>** could be detected in 0.106 mmol (27%, based on **1a**, determined by  $^{19}\text{F}$  NMR), this result suggested that the mesitylene could combine with trifluoromethyl radical to complete the catalytic cycle.



## 4. Proposed Mechanism for Synthesis of alkynyl arylsulfones



## 5. Spectroscopic Data

### 2-(phenylsulfonyl)-3,4-dihydronaphthalen-1(2H)-one (3a)<sup>[5]</sup>



According to the condition A, purification of the reaction mixture using column chromatography (petroleum ether/ethyl acetate = 5:1); white solid, 85.7 mg, yield: 75%.

**<sup>1</sup>H NMR** (400 MHz, CDCl<sub>3</sub>) δ 8.03 – 7.90 (m, 3H), 7.68 (dd, *J* = 9.1, 5.7 Hz, 1H), 7.63 – 7.48 (m, 3H), 7.37 – 7.24 (m, 2H), 4.14 (t, *J* = 5.8 Hz, 1H), 3.50 (ddt, *J* = 16.5, 10.6, 5.6 Hz, 1H), 3.01 (dt, *J* = 17.1, 5.3 Hz, 1H), 2.91 – 2.79 (m, 1H), 2.67 (ddt, *J* = 14.3, 9.7, 4.8 Hz, 1H). **<sup>13</sup>C NMR** (101 MHz, CDCl<sub>3</sub>) δ 188.6, 143.6, 139.0, 134.5, 134.0, 131.7, 129.1, 129.0, 129.0, 127.9, 127.9, 127.1, 69.6, 26.6, 23.6. Spectroscopic data matched with the reported data in the literature.

### 3-(phenylsulfonyl)chroman-4-one (3b)



According to the condition A, purification of the reaction mixture using column chromatography (petroleum ether/ethyl acetate = 4:1); white solid, 98.2 mg, yield: 85%; M.p. = 155~157 °C.

**<sup>1</sup>H NMR** (400 MHz, CDCl<sub>3</sub>) δ 7.84 (dd, *J* = 12.4, 7.9 Hz, 3H), 7.59 (t, *J* = 7.5 Hz, 1H), 7.47 (t, *J* = 7.2 Hz, 3H), 7.01 (t, *J* = 7.6 Hz, 1H), 6.88 (d, *J* = 8.4 Hz, 1H), 5.29 (dd, *J* = 12.9, 2.6 Hz, 1H), 4.73 (dd, *J* = 12.9, 4.1 Hz, 1H), 4.06 (d, *J* = 3.5 Hz, 1H). **<sup>13</sup>C NMR** (101 MHz, CDCl<sub>3</sub>) δ 182.5, 160.8, 137.9, 137.0, 134.4, 129.3, 128.9, 127.5, 122.1, 120.5, 118.1, 68.7, 66.0. **IR** (KBr, cm<sup>-1</sup>): 1686, 1605, 1477, 1465, 1308, 1275, 1148, 751, 725, 686, 590, 504. **HRMS** *m/z* (ESI) calcd. for C<sub>15</sub>H<sub>12</sub>NaO<sub>4</sub>S<sup>+</sup> (M + Na)<sup>+</sup> 311.0349, found 311.0351.

### 2-(phenylsulfonyl)-2,3-dihydro-1H-inden-1-one (3c)<sup>[6]</sup>



According to the condition A, purification of the reaction mixture using column chromatography (petroleum ether/ethyl acetate = 5:1); white solid, 82.6 mg, yield: 76%.

**<sup>1</sup>H NMR** (400 MHz, CDCl<sub>3</sub>) δ 7.92 (dd, *J* = 7.6, 1.6 Hz, 2H), 7.71 – 7.52 (m, 5H), 7.48 (d, *J* = 7.7 Hz, 1H), 7.37 (t, *J* = 7.5 Hz, 1H), 4.31 (dd, *J* = 8.4, 3.4 Hz, 1H), 3.79 (dd, *J* = 18.3, 3.4 Hz, 1H), 3.53 (dd, *J* = 18.3, 8.4 Hz, 1H). **<sup>13</sup>C NMR** (101 MHz, CDCl<sub>3</sub>) δ 194.5, 151.9, 137.6, 136.0, 135.8, 134.2, 129.2, 129.1, 128.2, 126.5, 124.8, 68.7, 28.2. Spectroscopic data matched with the reported data in the literature.

### 1-phenyl-2-(phenylsulfonyl)ethan-1-one (3d)<sup>[7]</sup>



According to the condition A, purification of the reaction mixture using column chromatography (petroleum ether/ethyl acetate = 5:1); White solid, 82.4 mg, yield: 79%.

**<sup>1</sup>H NMR** (400 MHz, CDCl<sub>3</sub>) δ 7.91 (t, *J* = 8.3 Hz, 4H), 7.62 (dt, *J* = 18.1, 7.4 Hz, 2H), 7.49 (dt, *J* = 29.1, 7.7 Hz, 4H), 4.77 (s, 2H). **<sup>13</sup>C NMR** (101 MHz, CDCl<sub>3</sub>) δ 188.1, 138.8, 135.7, 134.4, 134.2, 129.3, 129.2, 128.9, 128.5, 63.4. Spectroscopic data matched with the reported data in the literature.

### 2-(phenylsulfonyl)-1-(p-tolyl)ethan-1-one (3e)<sup>[8]</sup>



Due to the purification of enol triflates **2e** was failed (decomposed both in silica gel and  $\text{Al}_2\text{O}_3$  column), we used a mixture of ketone and enol triflate **2e** (about 8:4, 50 wt%)(425 mg) as the substrate. According to the condition A, purification of the reaction mixture using column chromatography (petroleum ether/ethyl acetate = 5:1); White solid, 50.6 mg, yield: 46%.

$^1\text{H NMR}$  (400 MHz, Chloroform-*d*)  $\delta$  7.98 – 7.78 (m, 4H), 7.65 (d,  $J = 7.4$  Hz, 1H), 7.54 (t,  $J = 7.8$  Hz, 2H), 7.27 (d,  $J = 8.0$  Hz, 2H), 4.74 (s, 2H), 2.42 (s, 3H).  $^{13}\text{C NMR}$  (101 MHz,  $\text{CDCl}_3$ )  $\delta$  187.55, 145.64, 138.76, 134.22, 133.28, 129.58, 129.46, 129.21, 128.56, 63.33, 21.82.

Spectroscopic data matched with the reported data in the literature.

#### methyl 4-(2-(phenylsulfonyl)acetyl)benzoate (**3f**)<sup>[8]</sup>



According to the condition A, purification of the reaction mixture using column chromatography (petroleum ether/ethyl acetate = 5:1); white solid, 88.6 mg, yield: 69%.

$^1\text{H NMR}$  (400 MHz,  $\text{CDCl}_3$ )  $\delta$  8.16 – 8.09 (m, 2H), 8.03 – 7.96 (m, 2H), 7.94 – 7.86 (m, 2H), 7.73 – 7.64 (m, 1H), 7.56 (dd,  $J = 8.4, 7.2$  Hz, 2H), 4.79 (s, 2H), 3.96 (s, 3H).  $^{13}\text{C NMR}$  (101 MHz,  $\text{CDCl}_3$ )  $\delta$  187.7, 165.9, 138.7, 138.6, 134.9, 134.4, 130.0, 129.3, 129.2, 128.5, 63.7, 52.6.

Spectroscopic data matched with the reported data in the literature.

#### 1-(4-iodophenyl)-2-(phenylsulfonyl)ethan-1-one (**3g**)<sup>[9]</sup>



According to the condition A, purification of the reaction mixture using column chromatography (petroleum ether/ethyl acetate = 5:1); white solid, 121.4 mg, yield: 79%.

$^1\text{H NMR}$  (400 MHz,  $\text{CDCl}_3$ )  $\delta$  7.92 – 7.83 (m, 4H), 7.72 – 7.64 (m, 3H), 7.57 (t,  $J = 7.7$  Hz, 2H), 4.71 (s, 2H).  $^{13}\text{C NMR}$  (101 MHz,  $\text{CDCl}_3$ )  $\delta$  187.4, 138.6, 138.2, 135.0, 134.4, 130.5, 129.3, 128.5, 103.1, 63.5. Spectroscopic data matched with the reported data in the literature.

#### 1-(4-bromophenyl)-2-(phenylsulfonyl)ethan-1-one (**3h**)<sup>[9]</sup>

According to the condition A, purification of the reaction mixture using column chromatography (petroleum ether/ethyl acetate = 5:1); white solid, 88.4 mg, yield: 67%.



$^1\text{H NMR}$  (400 MHz,  $\text{CDCl}_3$ )  $\delta$  7.92 – 7.85 (m, 2H), 7.82 (d,  $J = 8.6$  Hz, 2H), 7.73 – 7.52 (m, 5H), 4.73 (s, 2H).  $^{13}\text{C NMR}$  (101 MHz,  $\text{CDCl}_3$ )  $\delta$  187.1, 138.6, 134.5, 134.4, 132.2, 130.8, 130.0, 129.3, 128.5, 63.5. Spectroscopic data matched with the reported data in the literature.

#### 1-(2-fluorophenyl)-2-(phenylsulfonyl)ethan-1-one (**3i**)<sup>[10]</sup>



According to the condition A, purification of the reaction mixture using column chromatography (petroleum ether/ethyl acetate = 5:1); white solid, 83.2 mg, yield: 74%.

$^1\text{H NMR}$  (400 MHz,  $\text{CDCl}_3$ )  $\delta$  7.95 – 7.86 (m, 2H), 7.79 (td,  $J = 7.7, 1.9$  Hz, 1H), 7.64 (t,  $J = 7.4$  Hz, 1H), 7.53 (q,  $J = 8.0$  Hz, 3H), 7.22 (d,  $J = 7.6$  Hz, 1H), 7.09 (dd,  $J = 11.6, 8.3$  Hz, 1H), 4.81 (s, 2H).  $^{13}\text{C NMR}$  (101 MHz, Chloroform-*d*)  $\delta$  185.9 (d,  $J = 3.1$  Hz), 161.8 (d,  $J = 255.3$  Hz), 139.1, 136.1 (d,  $J = 9.5$  Hz), 134.1, 131.1 (d,  $J = 1.6$  Hz), 129.2, 128.5, 124.8 (d,  $J = 3.4$  Hz), 124.5 (d,  $J = 11.0$  Hz), 116.8 (d,  $J = 23.6$  Hz), 67.0 (d,  $J = 8.7$  Hz).  $^{19}\text{F NMR}$  (376 MHz,  $\text{CDCl}_3$ )  $\delta$  -108.65. Spectroscopic data matched with the reported data in the literature.

### 1-(3-chlorophenyl)-2-(phenylsulfonyl)ethan-1-one (3j)<sup>[11]</sup>



According to the condition A, purification of the reaction mixture using column chromatography (petroleum ether/ethyl acetate = 5:1); white solid, 95.0 mg, yield: 82%.

<sup>1</sup>H NMR (400 MHz, CDCl<sub>3</sub>) δ 7.94 – 7.81 (m, 4H), 7.68 (t, *J* = 7.5 Hz, 1H), 7.57 (q, *J* = 8.1, 6.3 Hz, 3H), 7.43 (t, *J* = 7.9 Hz, 1H), 4.74 (s, 2H). <sup>13</sup>C NMR (101 MHz, CDCl<sub>3</sub>) δ 187.0, 138.6, 137.2, 135.2, 134.4, 134.3, 130.2, 129.3, 129.1, 128.5, 127.5, 63.5. Spectroscopic data matched with the reported data in the literature.

### 1-(3-bromo-4-fluorophenyl)-2-(phenylsulfonyl)ethan-1-one (3k)



According to the condition A, purification of the reaction mixture using column chromatography (petroleum ether/ethyl acetate = 5:1); white solid, 92.4 mg, yield: 65%; M.p. = 138~140 °C.

<sup>1</sup>H NMR (400 MHz, CDCl<sub>3</sub>) δ 8.15 (dd, *J* = 6.5, 2.3 Hz, 1H), 7.95 (ddd, *J* = 8.6, 4.6, 2.3 Hz, 1H), 7.92 – 7.85 (m, 2H), 7.72 – 7.65 (m, 1H), 7.57 (t, *J* = 7.8 Hz, 2H), 7.22 (t, *J* = 8.3 Hz, 1H), 4.73 (s, 2H). <sup>13</sup>C NMR (101 MHz, Chloroform-*d*) δ 185.6, 162.7 (d, *J* = 258.1 Hz), 138.5, 135.2 (d, *J* = 2.1 Hz), 134.5, 133.2 (d, *J* = 3.5 Hz), 130.9 (d, *J* = 8.9 Hz), 129.4, 128.5, 117.0 (d, *J* = 23.2 Hz), 110.2 (d, *J* = 21.9 Hz), 63.5. IR (KBr, cm<sup>-1</sup>): 1681, 1587, 1489, 1322, 1275, 1261, 1154, 1084, 763, 749, 686, 556. HRMS *m/z* (ESI) calcd. for C<sub>14</sub>H<sub>10</sub>BrFNaO<sub>3</sub>S<sup>+</sup> (M + Na)<sup>+</sup> 378.9410, found 378.9408.

### 1-(3,4-dichlorophenyl)-2-(phenylsulfonyl)ethan-1-one (3l)<sup>[12]</sup>



According to the condition A, purification of the reaction mixture using column chromatography (petroleum ether/ethyl acetate = 5:1); white solid, 99.6 mg, yield: 68%.

<sup>1</sup>H NMR (400 MHz, CDCl<sub>3</sub>) δ 8.01 (d, *J* = 2.2 Hz, 1H), 7.93 – 7.86 (m, 2H), 7.82 (dd, *J* = 8.4, 2.2 Hz, 1H), 7.71 (t, *J* = 7.4 Hz, 1H), 7.59 (dt, *J* = 7.8, 3.5 Hz, 3H), 4.71 (s, 2H). <sup>13</sup>C NMR (101 MHz, CDCl<sub>3</sub>) δ 186.0, 139.3, 138.5, 135.2, 134.5, 133.7, 131.1, 131.0, 129.4, 128.5, 128.4, 63.6. Spectroscopic data matched with the reported data in the literature.

### 2-tosyl-3,4-dihydronaphthalen-1(2H)-one (3n)<sup>[13]</sup>



According to the condition A, purification of the reaction mixture using column chromatography (petroleum ether/ethyl acetate = 5:1); white solid, 98.4 mg, yield: 82%.

<sup>1</sup>H NMR (400 MHz, CDCl<sub>3</sub>) δ 8.00 (dd, *J* = 7.9, 1.4 Hz, 1H), 7.85 – 7.77 (m, 2H), 7.53 (td, *J* = 7.5, 1.4 Hz, 1H), 7.41 – 7.25 (m, 4H), 4.11 (t, *J* = 5.7 Hz, 1H), 3.53 (ddd, *J* = 17.0, 9.7, 4.7 Hz, 1H), 3.00 (dt, *J* = 17.0, 5.5 Hz, 1H), 2.87 (dq, *J* = 17.0, 5.6 Hz, 1H), 2.67 (dq, *J* = 9.5, 4.8 Hz, 1H), 2.47 (s, 3H). <sup>13</sup>C NMR (101 MHz, CDCl<sub>3</sub>) δ 188.8, 145.1, 143.6, 136.0, 134.5, 131.8, 129.7, 129.1, 128.9, 127.9, 127.0, 69.7, 26.6, 23.7, 21.7. Spectroscopic data matched with the reported data in the literature.

### 2-((4-(tert-butyl)phenyl)sulfonyl)-3,4-dihydronaphthalen-1(2H)-one (3o)



According to the condition A, purification of the reaction mixture using column chromatography (petroleum ether/ethyl acetate = 5:1); white solid, 83.4 mg, yield: 71%; M.p. = 122~124°C.

**<sup>1</sup>H NMR** (400 MHz, CDCl<sub>3</sub>) δ 7.99 (dd, *J* = 7.9, 1.4 Hz, 1H), 7.91 – 7.79 (m, 2H), 7.62 – 7.46 (m, 3H), 7.28 (dt, *J* = 14.6, 7.9 Hz, 2H), 4.13 (dd, *J* = 6.3, 5.3 Hz, 1H), 3.48 (ddd, *J* = 16.9, 9.5, 4.7 Hz, 1H), 2.98 (dt, *J* = 17.0, 5.5 Hz, 1H), 2.82 (dtd, *J* = 14.1, 6.2, 4.7 Hz, 1H), 2.64 (ddt, *J* = 14.4, 9.9, 5.1 Hz, 1H), 1.36 (s, 9H). **<sup>13</sup>C NMR** (101 MHz, CDCl<sub>3</sub>) δ 188.8, 157.9, 143.6, 136.0, 134.4, 131.8, 129.0, 128.9, 127.9, 127.0, 126.0, 69.7, 35.3, 31.1, 26.6, 23.8. **IR** (KBr, cm<sup>-1</sup>): 1681, 1595, 1455, 1399, 1316, 1274, 1107, 764, 659, 577, 557, 486. **HRMS** *m/z* (ESI) calcd. for C<sub>20</sub>H<sub>22</sub>NaO<sub>3</sub>S<sup>+</sup> (*M* + Na)<sup>+</sup> 365.1182, found 365.1190.

### 2-((4-methoxyphenyl)sulfonyl)-3,4-dihydronaphthalen-1(2H)-one (3p)

According to the condition A, purification of the reaction mixture using column chromatography (petroleum ether/ethyl acetate = 5:1); yellow solid, 55.8 mg, yield: 44%; M.p. = 133~135°C.



**<sup>1</sup>H NMR** (400 MHz, CDCl<sub>3</sub>) δ 7.99 (d, *J* = 7.9 Hz, 1H), 7.84 (d, *J* = 8.6 Hz, 2H), 7.51 (t, *J* = 7.5 Hz, 1H), 7.34 – 7.24 (m, 2H), 7.02 (d, *J* = 8.6 Hz, 2H), 4.09 (t, *J* = 5.8 Hz, 1H), 3.88 (s, 3H), 3.56 – 3.43 (m, 1H), 2.98 (dt, *J* = 17.1, 5.6 Hz, 1H), 2.83 (dq, *J* = 17.3, 5.6 Hz, 1H), 2.65 (tt, *J* = 9.6, 5.1 Hz, 1H). **<sup>13</sup>C NMR** (101 MHz, CDCl<sub>3</sub>) δ 189.0, 164.0, 143.6, 134.4, 131.8, 131.4, 130.4, 129.0, 127.9, 127.0, 114.2, 69.9, 55.7, 26.6, 23.8. **IR** (KBr, cm<sup>-1</sup>): 1681, 1594, 1578, 1497, 1298, 1262, 1113, 748, 679, 581, 536. **HRMS** *m/z* (ESI) calcd. for C<sub>17</sub>H<sub>16</sub>NaO<sub>4</sub>S<sup>+</sup> (*M* + Na)<sup>+</sup> 339.0662, found 339.0666.

### 2-((4-chlorophenyl)sulfonyl)-3,4-dihydronaphthalen-1(2H)-one (3q)



According to the condition A, purification of the reaction mixture using column chromatography (petroleum ether/ethyl acetate = 5:1); white solid, 70.8 mg, yield: 55%; M.p. = 123~125°C.

**<sup>1</sup>H NMR** (400 MHz, CDCl<sub>3</sub>) δ 7.97 (d, *J* = 7.9 Hz, 1H), 7.87 (d, *J* = 8.3 Hz, 2H), 7.54 (d, *J* = 8.0 Hz, 3H), 7.35 – 7.26 (m, 2H), 4.13 (t, *J* = 6.1 Hz, 1H), 3.46 (ddd, *J* = 17.0, 9.1, 4.7 Hz, 1H), 3.01 (dt, *J* = 17.1, 5.8 Hz, 1H), 2.88 – 2.76 (m, 1H), 2.68 (ddt, *J* = 14.2, 9.8, 5.2 Hz, 1H). **<sup>13</sup>C NMR** (101 MHz, CDCl<sub>3</sub>) δ 188.6, 143.5, 140.8, 137.5, 134.7, 131.6, 130.7, 129.3, 129.0, 127.9, 127.1, 69.7, 26.7, 23.5. **IR** (KBr, cm<sup>-1</sup>): 1682, 1598, 1476, 1316, 1145, 1086, 1047, 1024, 758, 627, 539, 485. **HRMS** *m/z* (ESI) calcd. for C<sub>16</sub>H<sub>13</sub>ClNaO<sub>3</sub>S<sup>+</sup> (*M* + Na)<sup>+</sup> 343.0166, found 343.0165.

### 2-((4-bromophenyl)sulfonyl)-3,4-dihydronaphthalen-1(2H)-one (3r)



According to the condition A, purification of the reaction mixture using column chromatography (petroleum ether/ethyl acetate = 5:1); white solid, 76.0 mg, yield: 52%; M.p. = 130~132°C.

**<sup>1</sup>H NMR** (400 MHz, CDCl<sub>3</sub>) δ 7.98 (dd, *J* = 7.9, 1.4 Hz, 1H), 7.84 – 7.77 (m, 2H), 7.75 – 7.67 (m, 2H), 7.54 (td, *J* = 7.5, 1.5 Hz, 1H), 7.37 – 7.27 (m, 2H), 4.12 (dd, *J* = 6.7, 5.3 Hz, 1H), 3.47 (ddd, *J* = 17.0, 9.1, 4.7 Hz, 1H), 3.02 (dt, *J* = 17.0, 5.7 Hz, 1H), 2.84 (dtd, *J* = 13.5, 6.6, 4.7 Hz, 1H), 2.69 (ddt, *J* = 14.2, 9.1, 5.1 Hz, 1H). **<sup>13</sup>C NMR** (101 MHz, CDCl<sub>3</sub>) δ 188.5, 143.5, 138.0, 134.6, 132.3, 131.6, 130.7, 129.5, 129.0, 127.9, 127.2, 69.7, 26.7, 23.5. **IR** (KBr, cm<sup>-1</sup>): 1681, 1598, 1573, 1316, 1143, 1082, 1023, 743, 650, 553. **HRMS** *m/z* (ESI) calcd. for C<sub>16</sub>H<sub>13</sub>BrNaO<sub>3</sub>S<sup>+</sup> (*M* + Na)<sup>+</sup> 386.9661, found 386.9663.

### 2-((3-chlorophenyl)sulfonyl)-3,4-dihydronaphthalen-1(2H)-one (3s)



According to the condition A, purification of the reaction mixture using column chromatography (petroleum ether/ethyl acetate = 5:1); white solid, 72.0 mg, yield: 56%; M.p. = 123~125°C.

**<sup>1</sup>H NMR** (400 MHz, CDCl<sub>3</sub>) δ 8.04 – 7.91 (m, 2H), 7.84 (dt, *J* = 7.9, 1.4 Hz, 1H), 7.65 (ddd, *J* = 8.1, 2.0, 1.0 Hz, 1H), 7.59 – 7.50 (m, 2H), 7.37 – 7.28 (m, 2H), 4.16 (dd, *J* = 6.7, 5.3 Hz, 1H), 3.48 (ddd, *J* = 17.0, 9.1, 4.7 Hz, 1H), 3.03 (dt, *J* = 17.0, 5.7 Hz, 1H), 2.85 (dtd, *J* = 13.6, 6.7, 4.7 Hz, 1H), 2.70 (dtd, *J* = 14.2, 9.1, 5.1 Hz, 1H). **<sup>13</sup>C NMR** (101 MHz, CDCl<sub>3</sub>) δ 188.4, 143.5, 140.8, 135.2, 134.7, 134.1, 131.6, 130.3, 129.1, 129.0, 128.0, 127.4, 127.2, 69.7, 26.7, 23.5. **IR** (KBr, cm<sup>-1</sup>): 1682, 1599, 1456, 1297, 1110, 1077, 681, 595, 561, 489, 444. **HRMS** *m/z* (ESI) calcd. for C<sub>16</sub>H<sub>13</sub>ClNaO<sub>3</sub>S<sup>+</sup> (M + Na)<sup>+</sup> 343.0166, found 343.0168.

### 2-((3-bromophenyl)sulfonyl)-3,4-dihydronaphthalen-1(2H)-one (3t)



According to the condition A, purification of the reaction mixture using column chromatography (petroleum ether/ethyl acetate = 5:1); white solid, 93.4 mg, yield: 64%; M.p. = 128~130 °C.

**<sup>1</sup>H NMR** (400 MHz, CDCl<sub>3</sub>) δ 8.08 (s, 1H), 7.98 (d, *J* = 7.9 Hz, 1H), 7.88 (d, *J* = 7.9 Hz, 1H), 7.79 (d, *J* = 7.9 Hz, 1H), 7.54 (t, *J* = 7.5 Hz, 1H), 7.46 (t, *J* = 7.9 Hz, 1H), 7.36 – 7.27 (m, 2H), 4.16 (t, *J* = 6.1 Hz, 1H), 3.46 (ddd, *J* = 17.0, 9.0, 4.7 Hz, 1H), 3.02 (dt, *J* = 17.1, 5.8 Hz, 1H), 2.83 (dtd, *J* = 13.6, 6.7, 4.6 Hz, 1H), 2.69 (dtd, *J* = 14.2, 9.7, 5.1 Hz, 1H). **<sup>13</sup>C NMR** (101 MHz, CDCl<sub>3</sub>) δ 188.4, 143.5, 140.9, 137.0, 134.6, 131.8, 131.6, 130.5, 129.0, 128.0, 127.9, 127.2, 122.9, 69.7, 26.7, 23.5. **IR** (KBr, cm<sup>-1</sup>): 1703, 1646, 1569, 1354, 1145, 1081, 1023, 764, 594, 561, 484. **HRMS** *m/z* (ESI) calcd. for C<sub>16</sub>H<sub>13</sub>BrNaO<sub>3</sub>S<sup>+</sup> (M + Na)<sup>+</sup> 386.9661, found 386.9662.

### Product 3u



According to the condition A, purification of the reaction mixture using column chromatography (petroleum ether/ethyl acetate = 5:1); white solid, 125.4 mg, yield: 67%, 1:1 d.r.; M.p = 75~78 °C.

**<sup>1</sup>H NMR** (400 MHz, CDCl<sub>3</sub>) δ 8.23 (d, *J* = 8.2 Hz, 2H), 7.99 (ddd, *J* = 11.6, 8.2, 1.6 Hz, 3H), 7.54 (td, *J* = 7.5, 1.4 Hz, 1H), 7.36 – 7.28 (m, 2H), 4.99 (td, *J* = 10.9, 4.4 Hz, 1H), 4.17 (ddd, *J* = 7.1, 5.5, 2.4 Hz, 1H), 3.50 (ddd, *J* = 16.8, 9.2, 4.7 Hz, 1H), 3.03 (dt, *J* = 17.1, 5.7 Hz, 1H), 2.88 (ddd, *J* = 14.2, 6.8, 5.0 Hz, 1H), 2.78 – 2.66 (m, 1H), 2.14 (dd, *J* = 12.1, 4.1 Hz, 1H), 1.96 (ddq, *J* = 13.5, 6.8, 3.5, 2.9 Hz, 1H), 1.79 – 1.72 (m, 2H), 1.66 – 1.54 (m, 2H), 1.21 – 1.10 (m, 2H), 1.00 – 0.90 (m, 7H), 0.81 (dd, *J* = 7.0, 1.3 Hz, 3H). **<sup>13</sup>C NMR** (101 MHz, CDCl<sub>3</sub>) δ 188.5, 188.4, 164.5, 164.5, 143.5, 142.7, 142.6, 135.7, 134.7, 131.6, 130.1, 129.2, 129.0, 128.0, 127.2, 75.9, 69.6, 47.2, 40.9, 40.9, 34.2, 31.5, 26.7, 26.7, 26.5, 26.4, 23.6, 23.5, 23.4, 22.0, 20.8, 20.8, 16.5, 16.4. **IR** (KBr, cm<sup>-1</sup>): 2955, 1715, 1682, 1485, 1270, 1240, 1115, 738, 619, 538. **HRMS** *m/z* (ESI) calcd. for C<sub>27</sub>H<sub>32</sub>NaO<sub>5</sub>S<sup>+</sup> (M + Na)<sup>+</sup> 491.1863, found 491.1861.

### 2-((2-iodophenyl)sulfonyl)-3,4-dihydronaphthalen-1(2H)-one (3v)



According to the condition A, purification of the reaction mixture using column chromatography (petroleum ether/ethyl acetate = 5:1); white solid, 40.9 mg, yield: 25%; M.p. = 132~136°C.

**<sup>1</sup>H NMR** (400 MHz, CDCl<sub>3</sub>) δ 8.15 (dd, *J* = 8.0, 1.6 Hz, 2H), 7.97 (dd, *J* = 7.9, 1.3 Hz, 1H), 7.64 – 7.52 (m, 2H), 7.38 – 7.30 (m, 3H), 4.83 (t, *J* = 5.8 Hz, 1H), 3.51 (dtd, *J* = 17.5, 7.8, 4.7

Hz, 1H), 3.11 – 2.95 (m, 2H), 2.82 – 2.70 (m, 1H).  $^{13}\text{C}$  NMR (101 MHz,  $\text{CDCl}_3$ )  $\delta$  188.5, 143.6, 142.5, 141.6, 134.6, 134.6, 132.9, 131.7, 129.0, 128.6, 127.9, 127.1, 92.9, 66.2, 26.8, 22.7. IR (KBr,  $\text{cm}^{-1}$ ): 1679, 1599, 1454, 1315, 1275, 1260, 1146, 1120, 1010, 755, 591, 488, 446. HRMS  $m/z$  (ESI) calcd. for  $\text{C}^{16}\text{H}^{13}\text{INaO}^3\text{S}^+$  ( $\text{M} + \text{Na}$ ) $^+$  434.9522, found 434.9525.

#### methyl (E)-5-phenyl-6-(phenylsulfonyl)hex-4-enoate (5a)



Under Argon atmosphere, **1** (0.4 mmol), **4** (0.8 mmol),  $\text{Ru}(\text{bpy})_3\text{Cl}_2$  (1 mol%) were dissolved in 1,4-dioxane (4 mL). After that, the solution was stirred under irradiation of white LEDs for **2 hours**. The crude products were purified by flash chromatography on silica gel (petroleum ether/ethyl acetate 5:1~2:1) to afford the aim products **5a**. Colorless oil, 84.2 mg, yield: 61%, E/Z > 20:1.

$^1\text{H}$  NMR (400 MHz,  $\text{CDCl}_3$ )  $\delta$  7.84 – 7.72 (m, 2H), 7.53 (t,  $J = 7.5$  Hz, 1H), 7.41 (t,  $J = 7.7$  Hz, 2H), 7.26 – 7.16 (m, 5H), 6.03 – 5.94 (m, 1H), 4.43 (s, 2H), 3.69 (s, 3H), 2.51 – 2.39 (m, 4H).  $^{13}\text{C}$  NMR (101 MHz,  $\text{CDCl}_3$ )  $\delta$  173.1, 140.6, 139.1, 136.1, 133.5, 129.3, 128.9, 128.4, 128.3, 127.4, 126.4, 57.6, 51.7, 33.2, 24.8. IR (KBr,  $\text{cm}^{-1}$ ): 1732, 1446, 1307, 1276, 1163, 1136, 1084, 1024, 906, 764, 688, 530. HRMS  $m/z$  (ESI) calcd. for  $\text{C}_{19}\text{H}_{20}\text{NaO}_4\text{S}^+$  ( $\text{M} + \text{Na}$ ) $^+$  367.0975, found 367.0977. The *E*-conformation was assigned by 2D NOE experiment.

#### (E)-7-phenyl-8-(phenylsulfonyl)oct-6-en-3-one (5b)



Under Argon atmosphere, **1** (0.4 mmol), **4** (0.8 mmol),  $\text{Ru}(\text{bpy})_3\text{Cl}_2$  (1 mol%) were dissolved in 1,4-dioxane (4 mL). After that, the solution was stirred under irradiation of white LEDs for **2 hours**. The crude products were purified by flash chromatography on silica gel (petroleum ether/ethyl acetate 5:1~2:1) to afford the aim products **5b**. Colorless oil, 82.2 mg, yield: 60%, E/Z > 20:1.

$^1\text{H}$  NMR (400 MHz,  $\text{CDCl}_3$ )  $\delta$  7.82 – 7.74 (m, 2H), 7.58 – 7.49 (m, 1H), 7.42 (dd,  $J = 8.4, 7.1$  Hz, 2H), 7.26 – 7.14 (m, 5H), 5.96 (t,  $J = 7.6$  Hz, 1H), 4.44 (s, 2H), 2.55 (t,  $J = 7.0$  Hz, 2H), 2.42 (dt,  $J = 14.7, 7.3$  Hz, 4H), 1.07 (t,  $J = 7.3$  Hz, 3H).  $^{13}\text{C}$  NMR (101 MHz,  $\text{CDCl}_3$ )  $\delta$  173.1, 140.6, 139.1, 136.1, 133.5, 129.3, 128.9, 128.4, 128.3, 127.4, 126.4, 57.6, 51.7, 33.2, 24.8. IR (KBr,  $\text{cm}^{-1}$ ): 2977, 1712, 1446, 1306, 1135, 1804, 912, 764, 748, 688, 590, 530. HRMS  $m/z$  (ESI) calcd. for  $\text{C}_{20}\text{H}_{22}\text{NaO}_3\text{S}^+$  ( $\text{M} + \text{Na}$ ) $^+$  365.1182, found 365.1185. The *E*-conformation was assigned by 2D NOE experiment.

#### (E)-3-(2-phenyl-3-(phenylsulfonyl)prop-1-en-1-yl)cyclohexan-1-one (5c)



Under Argon atmosphere, **1** (0.4 mmol), **4** (0.8 mmol),  $\text{Ru}(\text{bpy})_3\text{Cl}_2$  (1 mol%) were dissolved in 1,4-dioxane (4 mL). After that, the solution was stirred under irradiation of white LEDs for **2 hours**. The crude products were purified by flash chromatography on silica gel (petroleum ether/ethyl acetate 5:1~2:1) to afford the aim products **5c**. Yellow oil, 99.2 mg, yield: 73%, E/Z > 20:1.

$^1\text{H}$  NMR (400 MHz,  $\text{CDCl}_3$ )  $\delta$  7.72 (d,  $J = 7.7$  Hz, 2H), 7.50 (t,  $J = 7.4$  Hz, 1H), 7.36 (t,  $J = 7.7$  Hz, 2H), 7.22 – 7.10 (m, 5H), 5.89 (d,  $J = 10.1$  Hz, 1H), 4.40 (s, 2H), 3.17 (dddd,  $J = 16.8, 13.1, 8.5, 5.1$  Hz, 1H), 2.42 – 2.16 (m, 4H), 1.95 (dd,  $J = 18.3, 10.5$  Hz, 1H), 1.84 – 1.64 (m, 1H).  $^{13}\text{C}$  NMR (101 MHz,  $\text{CDCl}_3$ )  $\delta$  217.9, 140.4, 140.3, 139.0, 133.7, 128.9, 128.5, 128.4, 128.3, 127.5, 126.4, 57.8, 44.8, 38.1, 37.4, 29.8. IR (KBr,  $\text{cm}^{-1}$ ): 3058, 2932, 1740, 1446, 1307, 1135, 1084, 914, 743, 688, 610, 528. HRMS  $m/z$  (ESI) calcd. for  $\text{C}_{20}\text{H}_{20}\text{NaO}_3\text{S}^+$  ( $\text{M} + \text{Na}$ ) $^+$  363.1025, found 363.1026. The *E*-conformation was assigned by 2D



NOE experiment.

**(E)-3-(2-phenyl-3-(phenylsulfonyl)prop-1-en-1-yl)cyclohexan-1-one (5d)**



Under Argon atmosphere, **1** (0.4 mmol), **4** (0.8 mmol), Ru(bpy)<sub>3</sub>Cl<sub>2</sub> (1 mol%) were dissolved in 1,4-dioxane (4 mL). After that, the solution was stirred under irradiation of white LEDs for **2 hours**. The crude products were purified by flash chromatography on silica gel (petroleum ether/ethyl acetate 5:1~2:1) to afford the aim products **5ad**. Yellow oil, 106.1 mg, yield: 75%, E/Z > 20:1.

**<sup>1</sup>H NMR** (400 MHz, CDCl<sub>3</sub>) δ 7.73 (d, *J* = 7.5 Hz, 2H), 7.53 (t, *J* = 7.5 Hz, 1H), 7.40 (t, *J* = 7.6 Hz, 2H), 7.25 – 7.14 (m, 5H), 5.82 (d, *J* = 10.1 Hz, 1H), 4.36 (d, *J* = 3.0 Hz, 2H), 2.77 (qt, *J* = 10.6, 4.0 Hz, 1H), 2.45 – 2.34 (m, 1H), 2.34 – 2.21 (m, 2H), 2.20 – 2.02 (m, 2H), 1.86 – 1.66 (m, 2H), 1.52 (dtd, *J* = 13.4, 11.3, 3.5 Hz, 1H). **<sup>13</sup>C NMR** (101 MHz, CDCl<sub>3</sub>) δ 209.8, 140.3, 140.1, 139.0, 133.7, 129.0, 128.4, 127.7, 127.6, 126.6, 57.5, 46.8, 41.1, 39.3, 31.0, 25.1. **IR** (KBr, cm<sup>-1</sup>): 3032, 2930, 1741, 1442, 1280, 1130, 880, 721, 671, 586. **HRMS** *m/z* (ESI) calcd. for C<sub>21</sub>H<sub>22</sub>NaO<sub>3</sub>S<sup>+</sup> (*M* + Na)<sup>+</sup> 377.1182, found 377.1184. The *E*-conformation was assigned by 2D NOE experiment.

**(E)-3-(3-((4-methoxyphenyl)sulfonyl)-2-phenylprop-1-en-1-yl)cyclohexan-1-one (5e)**



Under Argon atmosphere, **1** (0.4 mmol), **4** (0.8 mmol), Ru(bpy)<sub>3</sub>Cl<sub>2</sub> (1 mol%) were dissolved in 1,4-dioxane (4 mL). After that, the solution was stirred under irradiation of white LEDs for **4 hours**. The crude products were purified by flash chromatography on silica gel (petroleum ether/ethyl acetate 5:1~2:1) to afford the aim products **5bd**. Yellow oil, 93.6 mg, yield: 61%, E/Z > 20:1.

**<sup>1</sup>H NMR** (400 MHz, CDCl<sub>3</sub>) δ 7.63 (d, *J* = 8.6 Hz, 2H), 7.27 – 7.12 (m, 5H), 6.84 (d, *J* = 8.6 Hz, 2H), 5.80 (d, *J* = 10.1 Hz, 1H), 4.33 (d, *J* = 3.2 Hz, 2H), 3.84 (s, 3H), 2.74 (qt, *J* = 10.7, 4.1 Hz, 1H), 2.47 – 2.35 (m, 1H), 2.26 (ddd, *J* = 21.9, 8.8, 4.2 Hz, 2H), 2.17 – 2.02 (m, 2H), 1.84 (dd, *J* = 13.3, 4.2 Hz, 1H), 1.70 (tt, *J* = 12.8, 4.2 Hz, 1H), 1.51 (dtd, *J* = 13.5, 11.4, 3.5 Hz, 1H). **<sup>13</sup>C NMR** (101 MHz, CDCl<sub>3</sub>) δ 209.9, 163.7, 140.4, 139.8, 130.5, 130.3, 128.3, 128.1, 127.5, 126.6, 114.2, 57.7, 55.7, 46.9, 41.1, 39.3, 31.0, 25.1. **IR** (KBr, cm<sup>-1</sup>): 2709, 1564, 1545, 1423, 1376, 1115, 1083, 949, 761, 669, 625, 556. **HRMS** *m/z* (ESI) calcd. for C<sub>22</sub>H<sub>24</sub>NaO<sub>4</sub>S<sup>+</sup> (*M* + Na)<sup>+</sup> 407.1288, found 407.1288. The *E*-conformation was assigned by 2D NOE experiment.

**(E)-3-(3-((4-chlorophenyl)sulfonyl)-2-phenylprop-1-en-1-yl)cyclohexan-1-one (5f)**



Under Argon atmosphere, **1** (0.4 mmol), **4** (0.8 mmol), Ru(bpy)<sub>3</sub>Cl<sub>2</sub> (1 mol%) were dissolved in 1,4-dioxane (4 mL). After that, the solution was stirred under irradiation of white LEDs for **2 hours**. The crude products were purified by flash chromatography on silica gel (petroleum ether/ethyl acetate 5:1~2:1) to afford the aim products **5g**. Yellow oil, 71.6 mg, yield: 46%, E/Z > 20:1.

**<sup>1</sup>H NMR** (400 MHz, CDCl<sub>3</sub>) δ 7.67 – 7.54 (m, 2H), 7.33 – 7.27 (m, 2H), 7.18 (dd, *J* = 5.0, 2.0 Hz, 3H), 7.13 – 7.04 (m, 2H), 5.83 (d, *J* = 10.1 Hz, 1H), 4.35 (d, *J* = 2.6 Hz, 2H), 2.84 (qt, *J* = 10.6, 4.0 Hz, 1H), 2.46 – 2.23 (m, 3H), 2.23 – 2.06 (m, 2H), 1.94 – 1.83 (m, 1H), 1.82 – 1.70 (m, 1H), 1.62 – 1.53 (m, 1H). **<sup>13</sup>C NMR** (101 MHz, CDCl<sub>3</sub>) δ 209.7, 140.4, 140.3, 140.1, 137.3, 129.9, 129.7, 128.4, 127.6, 127.5, 126.5, 57.7, 46.9, 41.1, 39.3, 31.0, 25.0. **IR** (KBr, cm<sup>-1</sup>): 1709, 1507, 1445, 1323, 1276, 1135, 1083, 909,

764, 699, 615, 555. **HRMS**  $m/z$  (ESI) calcd. for  $C_{21}H_{21}ClNaO_3S^+$  ( $M + Na$ )<sup>+</sup> 411.0792, found 411.0796. The *E*-conformation was assigned by 2D NOE experiment.

#### ((2-phenylallyl)sulfonyl)benzene(5g)



Under Argon atmosphere, **1** (0.4 mmol), **4** (0.8 mmol),  $Ru(bpy)_3Cl_2$  (1 mol%) were dissolved in 1,4-dioxane (4 mL). After that, the solution was stirred under irradiation of white LEDs for **4 hours**. The crude products were purified by flash chromatography on silica gel (petroleum ether/ethyl acetate 5:1~2:1) to afford the aim products **5e**. Yellow oil, 42.4 mg, yield: 41%.

**<sup>1</sup>H NMR** (400 MHz, Chloroform-*d*)  $\delta$  7.86 – 7.76 (m, 2H), 7.57 (t,  $J = 7.5$  Hz, 1H), 7.45 (t,  $J = 7.7$  Hz, 2H), 7.32 – 7.23 (m, 5H), 5.62 (s, 1H), 5.25 (s, 1H), 4.30 (s, 2H). **<sup>13</sup>C NMR** (101 MHz,  $CDCl_3$ )  $\delta$  138.8, 138.4, 136.5, 133.6, 128.9, 128.7, 128.4, 128.1, 126.2, 121.9, 62.1. Spectroscopic data matched with the reported data in the literature.

#### ((phenylethynyl)sulfonyl)benzene(7a)



Under Argon atmosphere, **1** (0.2 mmol), **6** (0.4 mmol), mesitylene (0.8 mmol), activated  $MS4\text{\AA}$  (100 mg),  $Ru(bpy)_3Cl_2$  (0.5 mol%) were dissolved in 1,4-dioxane (1 mL). After that, the solution was stirred under irradiation of white LEDs at room temperature for 12 hours. The crude products were purified by flash chromatography on silica gel (petroleum ether/ethyl acetate 10:1) to afford the aim products **7a**. Light yellow oil, 21.4 mg, yield: 43%.

**<sup>1</sup>H NMR** (400 MHz, Chloroform-*d*)  $\delta$  8.19 – 8.08 (m, 2H), 7.76 – 7.69 (m, 1H), 7.63 (t,  $J = 7.7$  Hz, 2H), 7.59 – 7.53 (m, 2H), 7.53 – 7.46 (m, 1H), 7.40 (t,  $J = 7.6$  Hz, 2H). **<sup>13</sup>C NMR** (101 MHz,  $CDCl_3$ )  $\delta$  141.81, 134.18, 132.77, 131.60, 129.39, 128.71, 127.42, 117.88, 93.51, 85.34. Spectroscopic data matched with the reported data in the literature.

#### 1-methyl-4-((phenylethynyl)sulfonyl)benzene(7b)<sup>[14]</sup>



Under Argon atmosphere, **1** (0.2 mmol), **6** (0.4 mmol), mesitylene (0.8 mmol), activated  $MS4\text{\AA}$  (100 mg),  $Ru(bpy)_3Cl_2$  (0.5 mol%) were dissolved in 1,4-dioxane (1 mL). After that, the solution was stirred under irradiation of white LEDs at room temperature for 12 hours. The crude products were purified by flash chromatography on silica gel (petroleum ether/ethyl acetate 10:1) to afford the aim products **7b**. Yellow soild, 21.1 mg, yield: 41%.

**<sup>1</sup>H NMR** (400 MHz, Chloroform-*d*)  $\delta$  8.06 – 7.95 (m, 2H), 7.58 – 7.46 (m, 3H), 7.40 (dt,  $J = 8.5, 7.1$  Hz, 4H), 2.49 (s, 3H). **<sup>13</sup>C NMR** (101 MHz,  $CDCl_3$ )  $\delta$  145.4, 139.0, 132.7, 131.4, 130.0, 128.7, 127.5, 118.04, 93.0, 85.6, 21.7. Spectroscopic data matched with the reported data in the literature.

#### 1-(tert-butyl)-4-((phenylethynyl)sulfonyl)benzene(7c)<sup>[14]</sup>



Under Argon atmosphere, **1** (0.2 mmol), **6** (0.4 mmol), mesitylene (0.8 mmol), activated  $MS4\text{\AA}$  (100 mg),  $Ru(bpy)_3Cl_2$  (0.5 mol%) were dissolved in 1,4-dioxane (1 mL). After that, the solution was stirred under irradiation of white LEDs at room temperature for 12 hours. The crude products were purified by flash chromatography on silica gel (petroleum ether/DCM 1:1) to afford the aim products **7c**. Yellow soild, 30.4 mg, yield: 51%.

**<sup>1</sup>H NMR** (400 MHz, Chloroform-*d*)  $\delta$  8.05 – 7.98 (m, 2H), 7.63 (d,  $J = 1.9$  Hz, 1H), 7.62 – 7.44 (m, 4H), 7.43 – 7.34 (m, 2H), 1.39 (s, 9H). **<sup>13</sup>C NMR** (101 MHz,  $CDCl_3$ )  $\delta$  158.3, 138.8, 132.8, 131.4, 128.7,

127.3, 126.4, 118.1, 93.0, 85.6, 35.4, 31.0. Spectroscopic data matched with the reported data in the literature.

#### 1-chloro-4-((phenylethynyl)sulfonyl)benzene(7d)<sup>[14]</sup>



Under Argon atmosphere, **1**(0.2 mmol), **6**(0.4 mmol), mesitylene(0.8 mmol), activated MS4Å(100 mg), Ru(bpy)<sub>3</sub>Cl<sub>2</sub> (0.5 mol%) were dissolved in 1,4-dioxane(1 mL). After that, the solution was stirred under irradiation of white LEDs at room temperature for 12 hours. The crude products were purified by flash chromatography on silica gel (petroleum ether/DCM 1:1) to afford the aim products **7c**. Yellow soild, 27.6 mg, yield: 50%.

<sup>1</sup>H NMR (400 MHz, Chloroform-*d*) δ 8.15 – 8.07 (m, 2H), 7.75 – 7.68 (m, 1H), 7.66 – 7.59 (m, 2H), 7.57 – 7.53 (m, 2H), 7.53 – 7.45 (m, 1H), 7.40 (t, *J* = 7.5 Hz, 2H). <sup>13</sup>C NMR (101 MHz, CDCl<sub>3</sub>) δ 141.9, 134.1, 132.8, 131.6, 129.4, 128.7, 127.4, 117.9, 93.5, 85.4. Spectroscopic data matched with the reported data in the literature.

#### 1-bromo-4-((phenylethynyl)sulfonyl)benzene(7e)<sup>[14]</sup>



Under Argon atmosphere, **1**(0.2 mmol), **6**(0.4 mmol), mesitylene(0.8 mmol), activated MS4Å(100 mg), Ru(bpy)<sub>3</sub>Cl<sub>2</sub> (0.5 mol%) were dissolved in 1,4-dioxane(1 mL). After that, the solution was stirred under irradiation of white LEDs at room temperature for 12 hours. The crude products were purified by flash chromatography on silica gel (petroleum ether/DCM 1:1) to afford the aim products **7e**. Yellow soild, 36.0 mg, yield: 50%. Spectroscopic data matched with the reported data in the literature.

<sup>1</sup>H NMR (400 MHz, Chloroform-*d*) δ 8.08 – 8.00 (m, 2H), 7.64 – 7.57 (m, 2H), 7.57 – 7.47 (m, 3H), 7.45 – 7.36 (m, 2H). <sup>13</sup>C NMR (101 MHz, CDCl<sub>3</sub>) δ 141.0, 140.3, 132.8, 131.7, 129.7, 128.9, 128.7, 117.7, 94.0, 85.1.

#### 1-bromo-3-((phenylethynyl)sulfonyl)benzene(7f)<sup>[14]</sup>



Under Argon atmosphere, **1**(0.2 mmol), **6**(0.4 mmol), mesitylene(0.8 mmol), activated MS4Å(100 mg), Ru(bpy)<sub>3</sub>Cl<sub>2</sub> (0.5 mol%) were dissolved in 1,4-dioxane(1 mL). After that, the solution was stirred under irradiation of white LEDs at room temperature for 12 hours. The crude products were purified by flash chromatography on silica gel (petroleum ether/DCM 1:1) to afford the aim products **7f**. Yellow soild, 19.3 mg, yield: 30%. Spectroscopic data matched with the reported data in the literature.

<sup>1</sup>H NMR (400 MHz, Chloroform-*d*) δ 8.24 (t, *J* = 1.9 Hz, 1H), 8.04 (ddd, *J* = 7.9, 1.8, 1.0 Hz, 1H), 7.83 (ddd, *J* = 8.1, 2.0, 1.0 Hz, 1H), 7.62 – 7.46 (m, 4H), 7.42 (dd, *J* = 8.2, 6.9 Hz, 2H). <sup>13</sup>C NMR (101 MHz, CDCl<sub>3</sub>) δ 143.6, 137.2, 132.9, 131.8, 130.9, 130.3, 128.8, 126.0, 123.3, 117.6, 94.4, 84.9.

#### Compound 9



Under Argon atmosphere, **8**(0.2 mmol), **1**(0.4 mmol), Ru(bpy)<sub>3</sub>Cl<sub>2</sub>(1 mol%) were dissolved in 1,4-dioxane(1 mL). After that, the solution was stirred under irradiation of white LEDs at room temperature for **2 hours**. The crude products were purified by flash chromatography on silica gel (petroleum ether/ethyl acetate 5:1~2:1) to afford the aim products **9**. Yellow oil, 35.8 mg, yield: 45%, 1:1 d.r..

**<sup>1</sup>H NMR** (400 MHz, Chloroform-*d*)  $\delta$  8.09 (dd,  $J = 8.4, 3.0$  Hz, 1H), 7.62 – 7.54 (m, 1H), 7.39 (t,  $J = 7.7$  Hz, 1H), 7.34 – 7.27 (m, 2H), 7.21 (td,  $J = 8.0, 2.6$  Hz, 1H), 6.94 (td,  $J = 7.5, 2.6$  Hz, 1H), 6.86 (dd,  $J = 8.0, 2.1$  Hz, 1H), 4.79 (q,  $J = 9.5$  Hz, 1H), 4.61 (ddd,  $J = 16.1, 9.7, 6.3$  Hz, 1H), 4.26 – 4.13 (m, 1H), 4.13 – 4.02 (m, 1H), 3.98 (dd,  $J = 7.2, 5.5$  Hz, 1H), 3.82 – 3.73 (m, 1H), 3.42 (ddd,  $J = 13.6, 9.7, 4.5$  Hz, 2H), 3.02 (ddd,  $J = 17.0, 7.1, 4.9$  Hz, 1H), 2.85 (ddtd,  $J = 11.6, 8.9, 7.1, 4.5$  Hz, 1H), 2.69 (tt,  $J = 14.1, 5.2$  Hz, 1H). **<sup>13</sup>C NMR** (101 MHz, CDCl<sub>3</sub>)  $\delta$  189.6, 189.5, 159.8, 159.7, 143.8, 135.0, 131.4, 129.4, 129.3, 129.0, 128.2, 127.3, 127.0, 126.9, 124.6, 124.4, 121.0, 120.9, 110.1, 110.0, 76.0, 76.0, 68.1, 66.8, 58.4, 58.0, 36.2, 35.8, 26.8, 26.72, 22.0, 21.8. **IR** (KBr, cm<sup>-1</sup>): 1678, 1598, 1482, 1458, 1304, 1235, 1129, 1017, 966, 913, 748. **HRMS**  $m/z$  (ESI) calcd. for C<sub>19</sub>H<sub>18</sub>NaO<sub>4</sub>S<sup>+</sup> (M + Na)<sup>+</sup> 365.0818, found 365.0816.

### 1-(3-chlorophenyl)-3,3,3-trifluoropropan-1-one<sup>[15]</sup>



Under Argon atmosphere, **3i** (0.8 mmol), Ru(bpy)<sub>3</sub>Cl<sub>2</sub> (2.56 mg) were dissolved in 1,4-dioxane (4 mL). After that, the solution was stirred under irradiation of white LEDs at room temperature for 1 hour. The crude products were purified by flash chromatography on silica gel (petroleum ether/EA 20:1) to afford the aim products **3i'**. Colorless oil, 65.7 mg, yield: 37%.

**<sup>1</sup>H NMR** (400 MHz, Chloroform-*d*)  $\delta$  7.91 (t,  $J = 1.9$  Hz, 1H), 7.82 (dt,  $J = 7.8, 1.3$  Hz, 1H), 7.62 (ddd,  $J = 8.0, 2.1, 1.0$  Hz, 1H), 7.48 (t,  $J = 7.9$  Hz, 1H), 3.81 (q,  $J = 9.9$  Hz, 2H). **<sup>13</sup>C NMR** (101 MHz, CDCl<sub>3</sub>)  $\delta$  188.6, 188.6, 134.2, 130.3, 128.4, 126.4, 123.8 (q,  $J = 277.0$  Hz), 42.2 (q,  $J = 28.5$  Hz). **<sup>19</sup>F NMR** (376 MHz, CDCl<sub>3</sub>)  $\delta$  -62.09.

### Compound 10<sup>[16]</sup>



Under Argon atmosphere, **1** (0.2 mmol), **6** (0.4 mmol), Ru(bpy)<sub>3</sub>Cl<sub>2</sub> (2 mol%) were dissolved in 1,4-dioxane (1 mL). After that, the solution was stirred under irradiation of white LEDs at room temperature for 2 hours. The crude products were purified by flash chromatography on silica gel (petroleum ether/EA 20:1) to afford the aim products **10**. Colorless oil, 24 mg, yield: 32%.

**<sup>1</sup>H NMR** (400 MHz, Chloroform-*d*)  $\delta$  7.48 (dd,  $J = 7.4, 2.1$  Hz, 2H), 7.33 (d,  $J = 6.6$  Hz, 3H), 4.59 (dd,  $J = 8.5, 2.9$  Hz, 1H), 3.96 (dt,  $J = 11.5, 3.4$  Hz, 2H), 3.80 – 3.68 (m, 4H). **<sup>13</sup>C NMR** (101 MHz, CDCl<sub>3</sub>)  $\delta$  131.9, 128.7, 128.3, 122.1, 86.6, 84.3, 70.4, 66.5, 66.4, 65.8. Spectroscopic data matched with the reported data in the literature.

## 6. Reference

- [1] a) T. Kawamoto, R. Sasaki, A. Kamimura, *Angew. Chem. Int. Ed.*, **2017**, *56*, 1342. b) X. Su, H. Huang, Y. Yuan, Y. Li, *Angew. Chem. Int. Ed.*, **2017**, *56*, 1338; c) A. G. Martínez, A. Herrera, R. Martínez, E. Teso, A. García, J. Osío, L. Pargada, R. Unanue, L. R. Subramanian, M. Hanack, *J. Heterocycl. Chem.*, **1988**, *25*, 1237–1241.
- [2] a) Y. Gu, X. Duan, L. Yang, L. Guo, *Org. Lett.*, **2017**, *19*, 5908; b) N. Micic, A. Polyzos, *Org. Lett.* **2018**, *20*, 4663.
- [3] M. Zheng, G. Li, H. Lu, *Org. Lett.* **2019**, *21*, 1216.
- [4] H. Jiang, Y. He, Y. Cheng, and S. Yu, *Org. Lett.* **2017**, *19*, 1240.
- [5] G. Pandey, J. Vaitla, *Org. Lett.*, **2015**, *17*, 4890.
- [6] Y. Ju, D. Kumar, R. S. Varma, *J. Org. Chem.*, **2006**, *71*, 6697.
- [7] N. Hsueh, H. Chen, M. Chang, *J. Org. Chem.*, **2017**, *82*, 13324.
- [8] Y. Xiong, J. Weng, G. Lu, *Adv. Synth. Catal.*, **2018**, *360*, 1611.
- [9] V. S. Rawat, P. L. M. Reddya, B. Sreedhar, *RSC Adv.*, **2014**, *4*, 5165.
- [10] Q. Lu, J. Zhang, G. Zhao, Y. Qi, H. Wang, A. Lei, *J. Am. Chem. Soc.*, **2013**, *135*, 11481.
- [11] W. Wei, J. Wen, D. Yang, M. Wu, J. You, H. Wang, *Org. Biomol. Chem.*, **2014**, *12*, 7678.
- [12] J. Xiang, M. Ipek, V. Suri, M. Tam, Y. Xing, N. Huang, Y. Zhang, J. Tobin, T. S. Mansour, J. McKew, *Bioorg. Med. Chem.*, **2007**, *15*, 4396.
- [13] L. Xie, X. Zhen, S. Huang, X. Su, M. Lin, Y. Li, *Green Chem.*, **2017**, *19*, 3530.
- [14] J. Meesin, P. Katrun, C. Pareseecharoen, M. Pohmakotr, V. Reutrakul, D. Soorukram, and C. Kuhakarn, *J. Org. Chem.* **2016**, *81*, 2744.
- [15] S. Liu, J. Jie, J. Yu, X. Yang, *Adv. Synth. Catal.*, **2018**, *360*, 267.
- [16] J. Gong, P. L. Fuchs, *J. Am. Chem. Soc.* **1996**, *118*, 4486.

## 7. Copies of NMR spectra

2-(phenylsulfonyl)-3,4-dihydronaphthalen-1(2H)-one (3a)



**3-(phenylsulfonyl)chroman-4-one (3b)**



**2-(phenylsulfonyl)-2,3-dihydro-1H-inden-1-one (3c)**





### 1-phenyl-2-(phenylsulfonyl)ethan-1-one (3d)



2-(phenylsulfonyl)-1-(p-tolyl)ethan-1-one (3e)



**methyl 4-(2-(phenylsulfonyl)acetyl)benzoate (3f)**



**1-(4-iodophenyl)-2-(phenylsulfonyl)ethan-1-one (3g)**



**1-(4-bromophenyl)-2-(phenylsulfonyl)ethan-1-one (3h)**



1-(2-fluorophenyl)-2-(phenylsulfonyl)ethan-1-one (3i)





-108.6515



### 1-(3-chlorophenyl)-2-(phenylsulfonyl)ethan-1-one (3j)





**1-(3-bromo-4-fluorophenyl)-2-(phenylsulfonyl)ethan-1-one (3k)**



—96.7602



**1-(3,4-dichlorophenyl)-2-(phenylsulfonyl)ethan-1-one (3l)**



2-tosyl-3,4-dihydronaphthalen-1(2H)-one (3n)



**2-((4-(tert-butyl)phenyl)sulfonyl)-3,4-dihydronaphthalen-1(2H)-one (3o)**



2-((4-methoxyphenyl)sulfonyl)-3,4-dihydronaphthalen-1(2H)-one (3p)



2-((4-chlorophenyl)sulfonyl)-3,4-dihydronaphthalen-1(2H)-one (3q)



2-((4-bromophenyl)sulfonyl)-3,4-dihydronaphthalen-1(2H)-one(3r)





**2-((3-chlorophenyl)sulfonyl)-3,4-dihydronaphthalen-1(2H)-one(3s)**



**2-((3-bromophenyl)sulfonyl)-3,4-dihydronaphthalen-1(2H)-one (3t)**



**Product 3u**



2-((2-iodophenyl)sulfonyl)-3,4-dihydronaphthalen-1(2H)-one (3v)



**methyl (E)-5-phenyl-6-(phenylsulfonyl)hex-4-enoate (5a)**





(E)-7-phenyl-8-(phenylsulfonyl)oct-6-en-3-one (5b)







**(E)-3-(2-phenyl-3-(phenylsulfonyl)prop-1-en-1-yl)cyclohexan-1-one (5c)**





**(E)-3-(2-phenyl-3-(phenylsulfonyl)prop-1-en-1-yl)cyclohexan-1-one (5d)**





**(E)-3-(3-((4-methoxyphenyl)sulfonyl)-2-phenylprop-1-en-1-yl)cyclohexan-1-one (5e)**





(E)-3-(3-((4-chlorophenyl)sulfonyl)-2-phenylprop-1-en-1-yl)cyclohexan-1-one (5f)







**((2-phenylallyl)sulfonyl)benzene(5g)**



138.7632  
138.4209  
136.4755  
133.6304  
128.8915  
128.6468  
128.4047  
128.0554  
126.1897  
121.8672  
-62.0661



**((phenylethynyl)sulfonyl)benzene(7a)**



**1-methyl-4-((phenylethynyl)sulfonyl)benzene(7b)**



1-(tert-butyl)-4-((phenylethynyl)sulfonyl)benzene(7c)



# 1-chloro-4-((phenylethynyl)sulfonyl)benzene(7d)



# 1-bromo-4-((phenylethynyl)sulfonyl)benzene(7e)



# 1-bromo-3-((phenylethynyl)sulfonyl)benzene(7f)

8.2459  
8.2411  
8.2364  
8.0539  
8.0515  
8.0497  
8.0471  
8.0342  
8.0298  
8.0318  
8.0272  
7.8485  
7.8460  
7.8437  
7.8411  
7.8284  
7.8260  
7.8236  
7.8210  
7.5906  
7.5859  
7.5828  
7.5790  
7.5706  
7.5654  
7.5614  
7.5461  
7.5428  
7.5392  
7.5263  
7.5236  
7.5187  
7.5064  
7.5013  
7.4867  
7.4345  
7.4303  
7.4182  
7.4149  
7.4105  
7.4004  
7.3967  
7.3942



143.5491  
137.2098  
132.8721  
131.8231  
130.8899  
130.3379  
128.7527  
125.9893  
123.2696  
117.5872  
- 94.3880  
- 84.8572



**1-(3-chlorophenyl)-3,3,3-trifluoropropan-1-one (3j')**







--62.0922



**Compound 9**
